# Supplementary material for: Identification of Atrial Transmural Conduction Inhomogeneity Using Unipolar Electrogram Morphology
Source: MDPI journal article supplement (doi:10.3390/jcm13041015), 2024-02-09
Supplement: s1 [file s1]

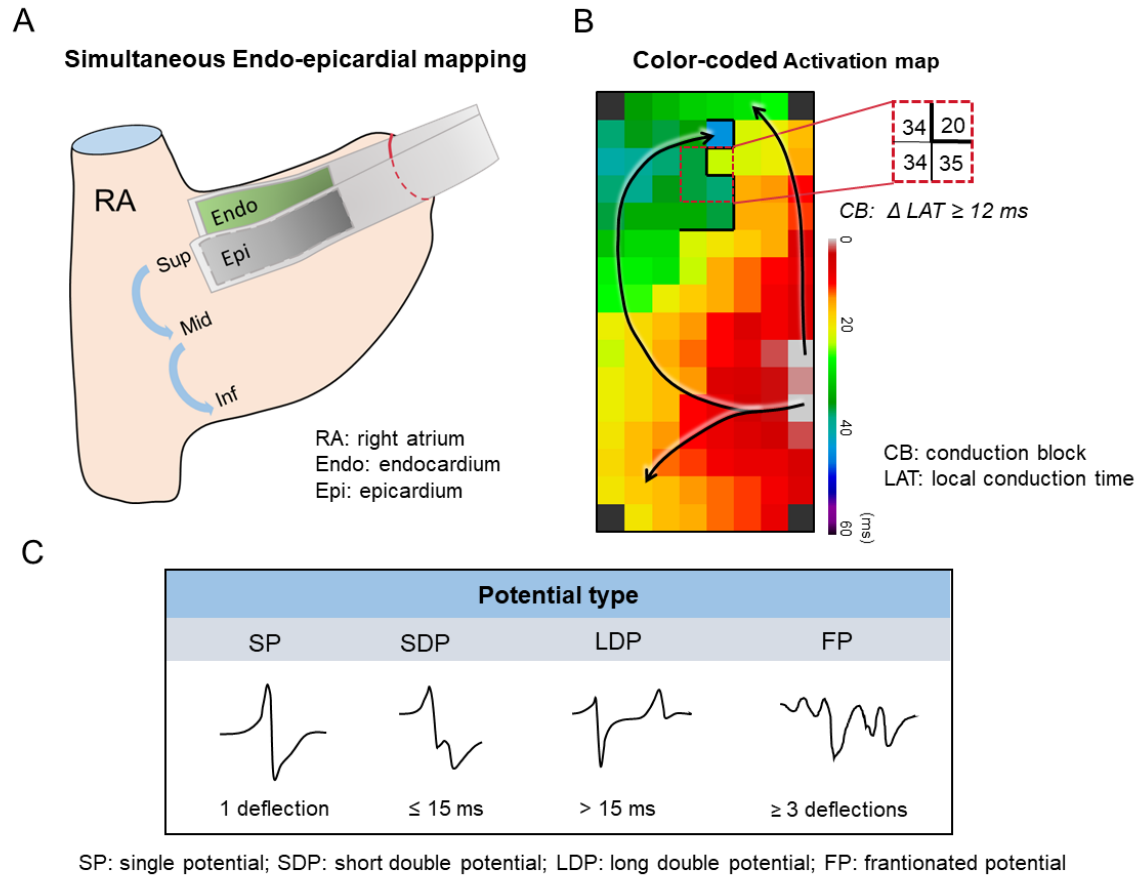

**Figure S1.** Panel A: simultaneous endo-epicardial mapping procedure covering three sites at the RA (superior, middle and inferior). Panel B: color-coded activation map demonstrating a line of CB which are indicated by thick black lines. Panel C: various unipolar potential types. RA = right atrium; endo = endocardium; epi = epicardium; CB = conduction block; LAT = local activation time; SP = single potential; SDP = short double potential; LDP = long double potential; FP = fractionated potential.
